# Supplementary material
Source: Springer Nature journal article supplement (https://www.springermedizin.de/resource/supplementary/12958_2005_289_MOESM3_ESM.pdf/9567690)
Supplement: MOESM3 [file 9567690]

**DEFB21** MRLLMALP LLALLPQVIPDYSAEKRC LNRLGHCKRKCKAGEMVMETCKYFQVCCVLDDNDYKQKASITRTMEKTSTIEYNLS

^

**DEFB24** MKLVLLLLAIFVTTELVMSGKNPTLQCMGNRGFCRPSCKKGEQAYFYCRTYQICCLQSHVRISLTGVEDNTNWSYEKHWRIP

^

**DEFB27** MKTAVLTMVLLLLLSQVIPGSPEKCKWKSFGICREECLRKEKFYIFCWDGSLCCVKPKNVPQWSQSSE

^

**DEFB30** MGSLQLILVLFVLLSDVPPVRSGVNMYIRQIYDTCKWKLKGHCNRVCGKKEIFHIFCGTQFLCCIERKEMPVLFVK

^

**DEFB36** MKLLLLTLAALLLSQLTPGDAQKCWNLHGKCRHRCSRKESVYVYCTNGKMCCVKPKYQPKPKPWF

^

....
